# Supplementary material for: Rethinking Stress in Parents of Preterm Infants: A Meta-Analysis
Source: PubMed Central journal article supplement (PMC3566126; doi:10.1371/journal.pone.0054992), 2013-02-06

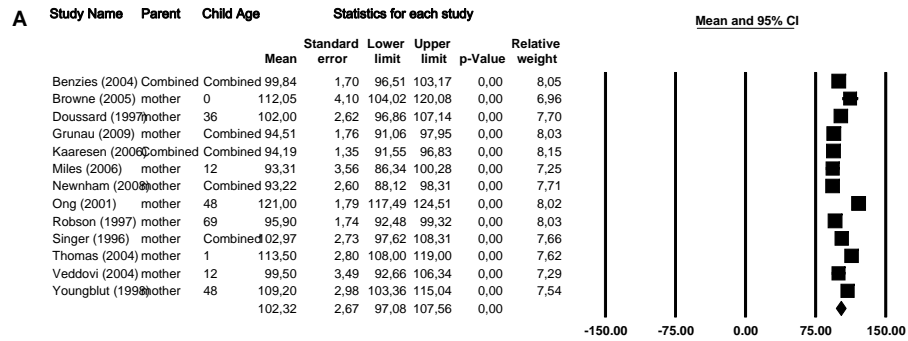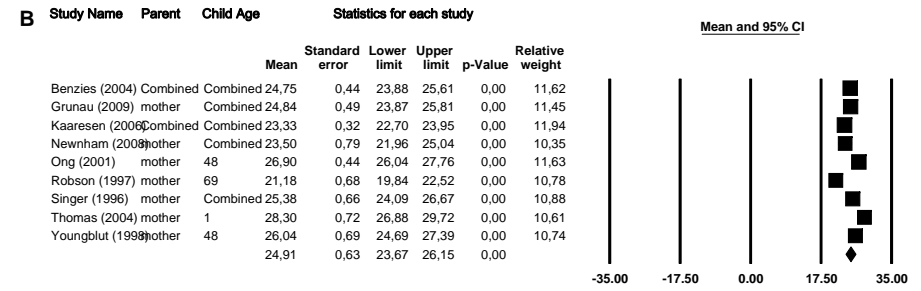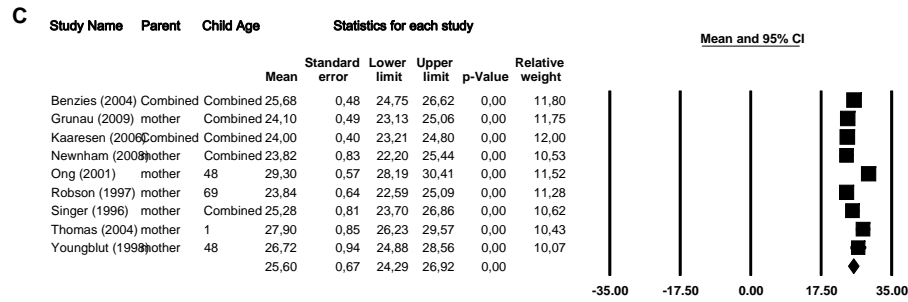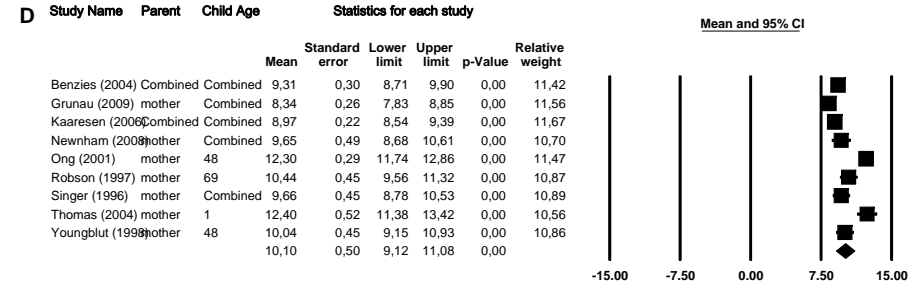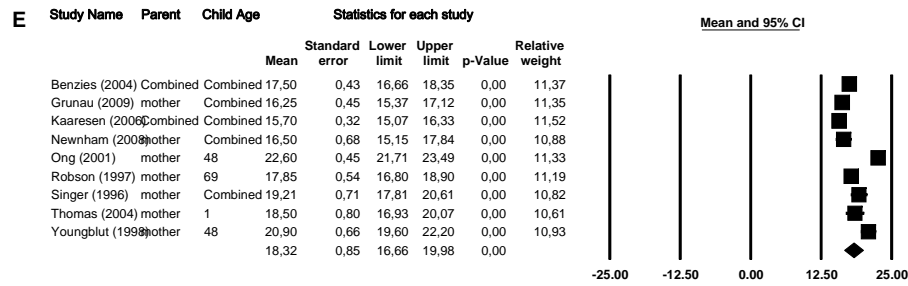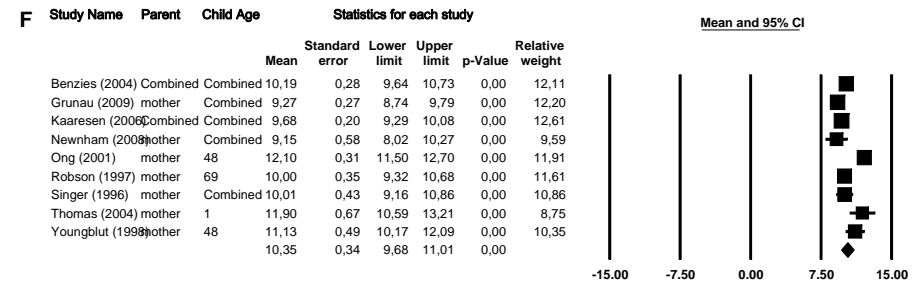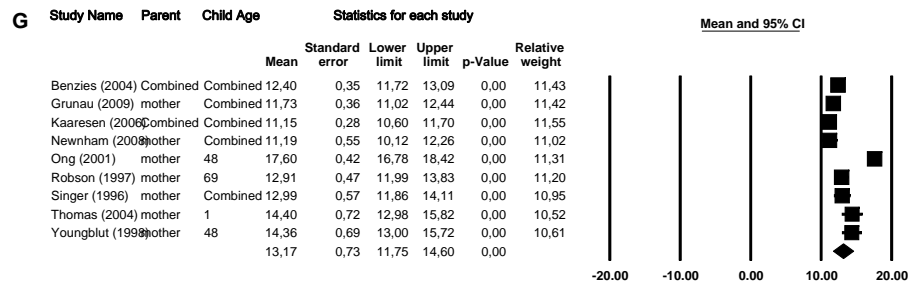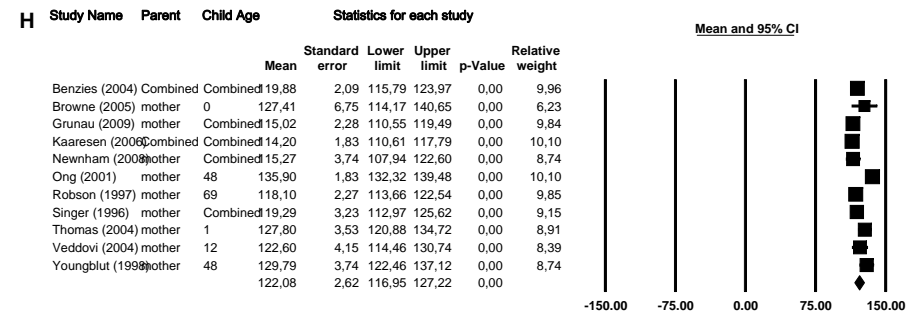

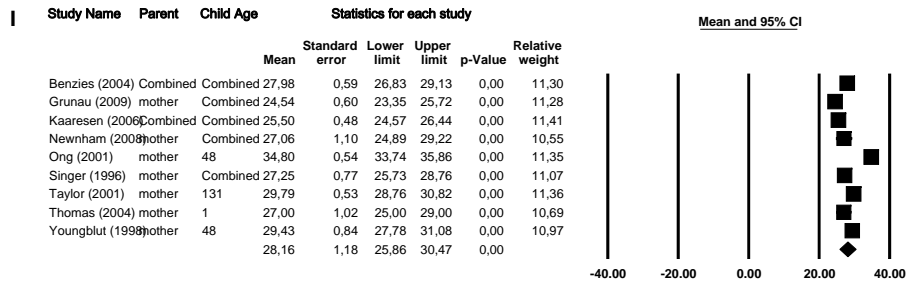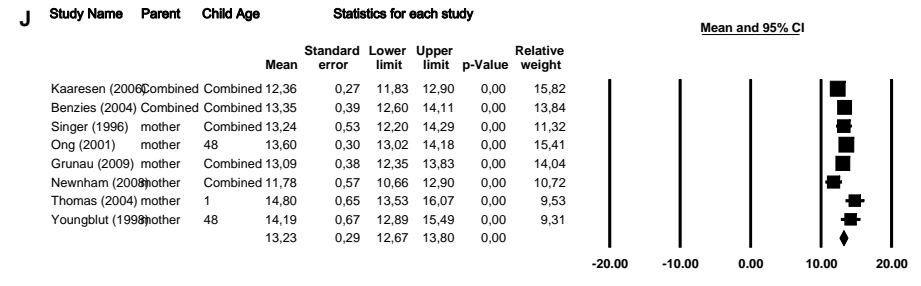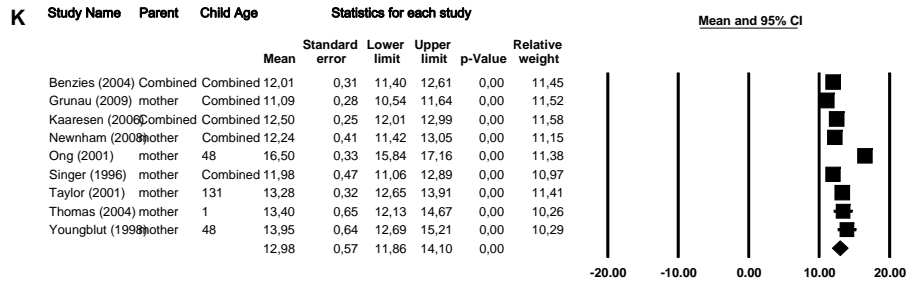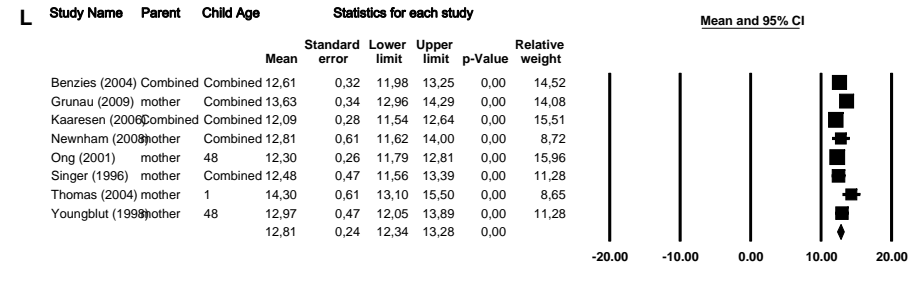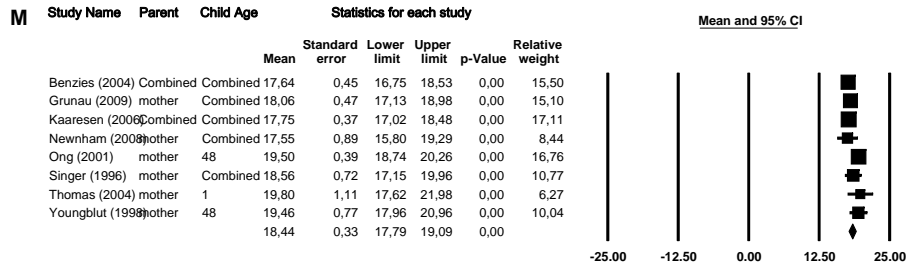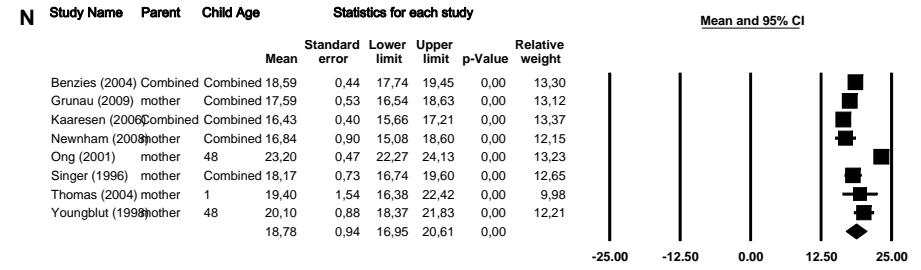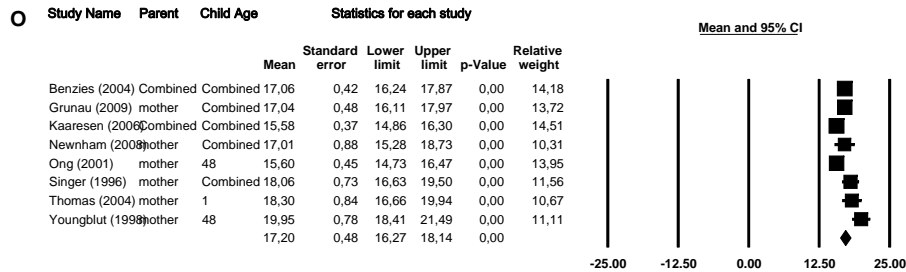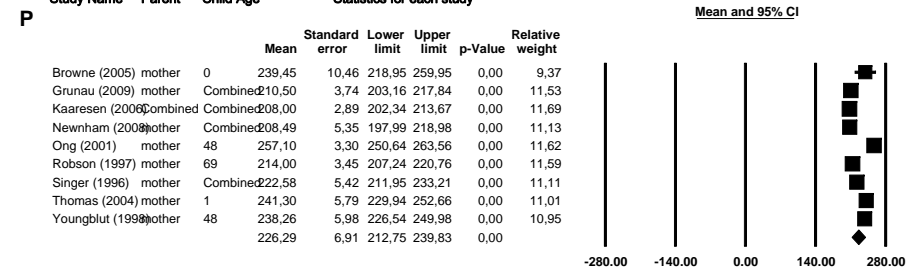

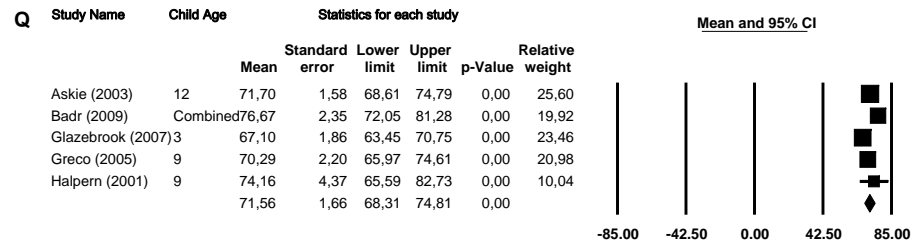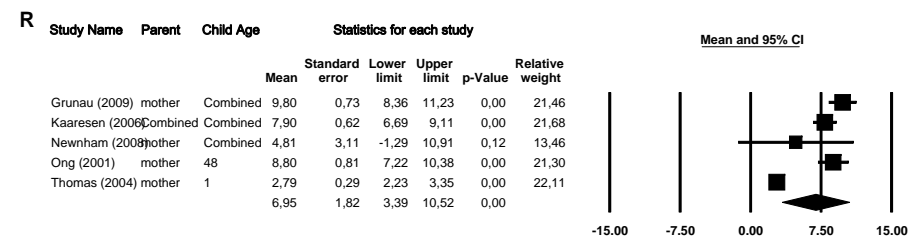

Supplement: pone.0054992.s002.pdf [file pone.0054992.s002.pdf]
