# Supplementary material for: Rethinking Stress in Parents of Preterm Infants: A Meta-Analysis
Source: PubMed Central journal article supplement (PMC3566126; doi:10.1371/journal.pone.0054992), 2013-02-06

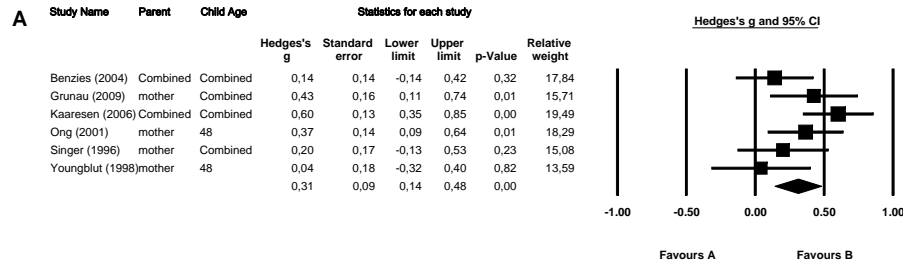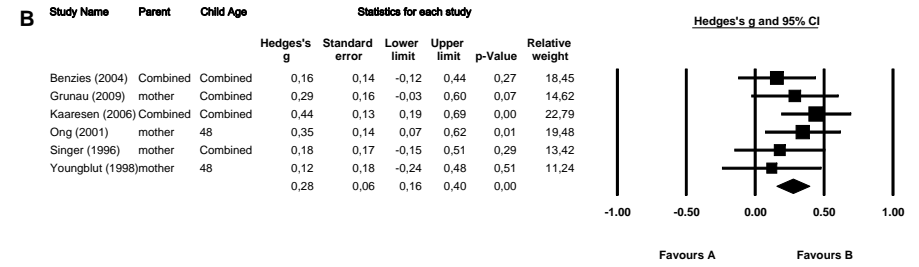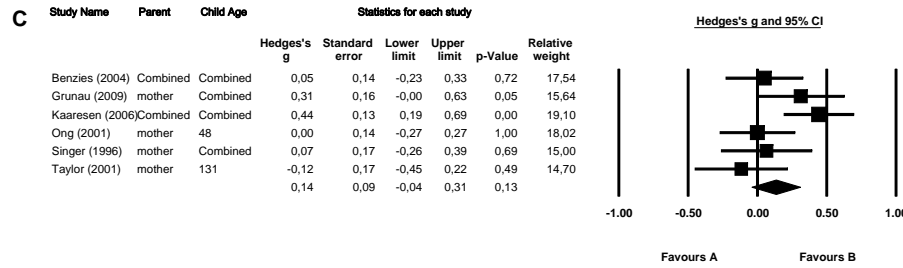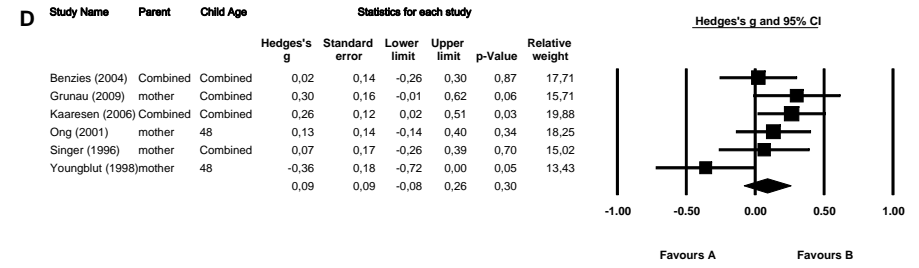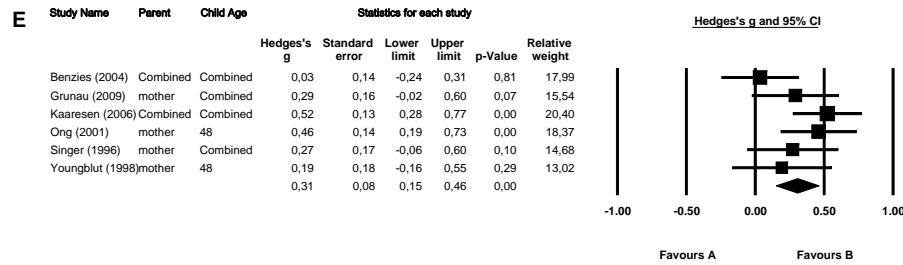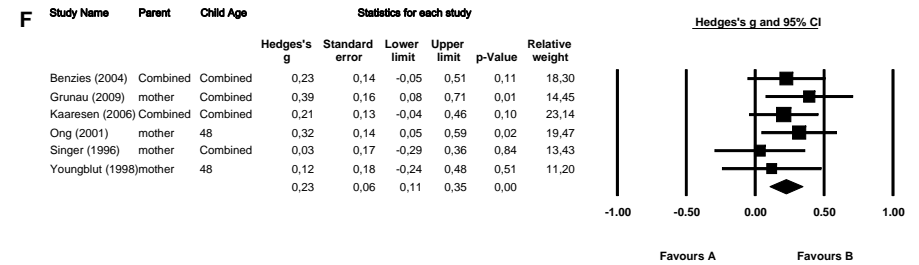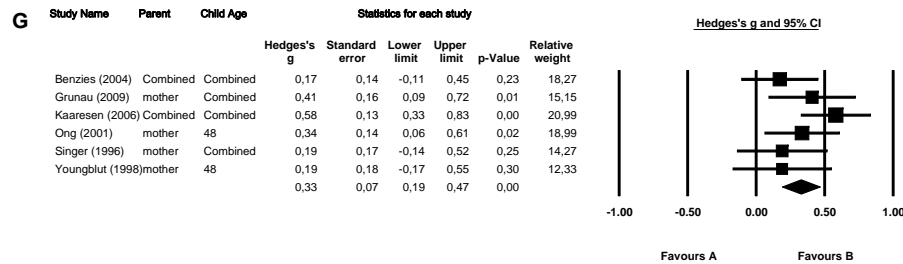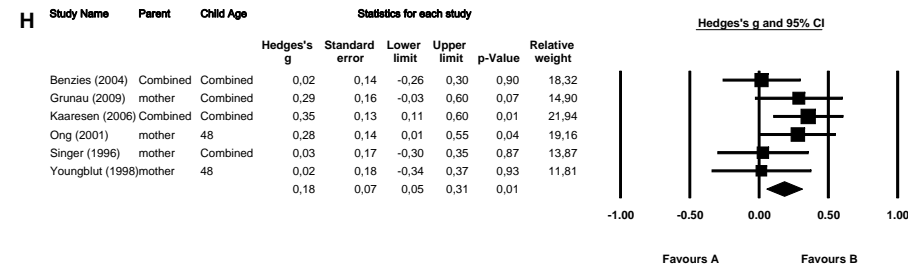

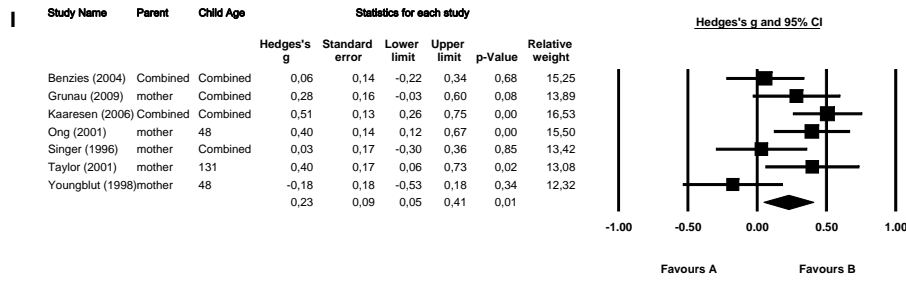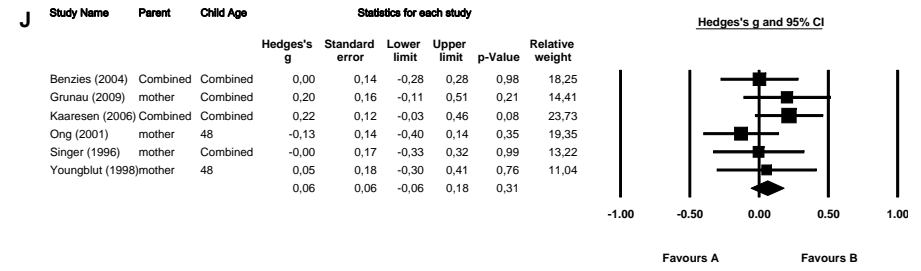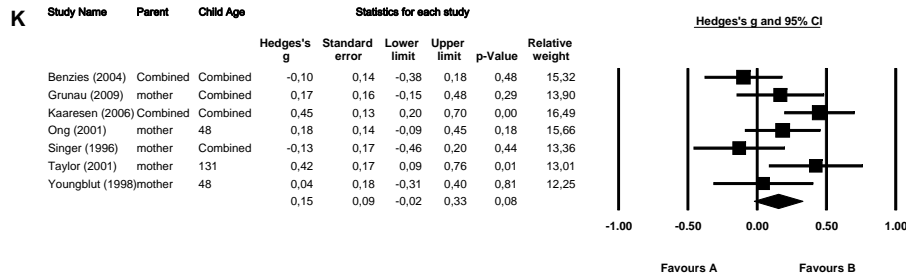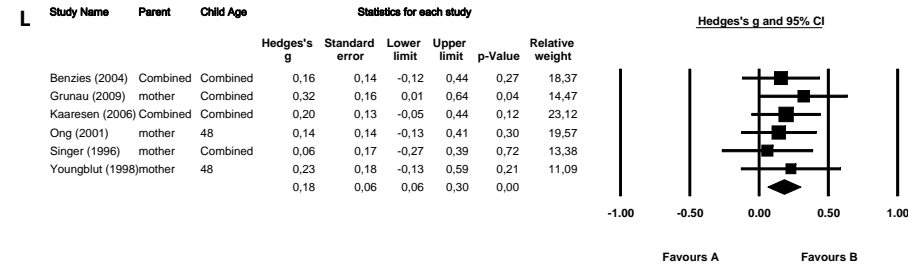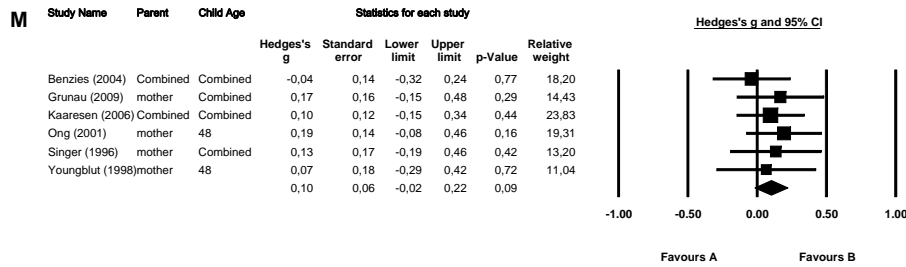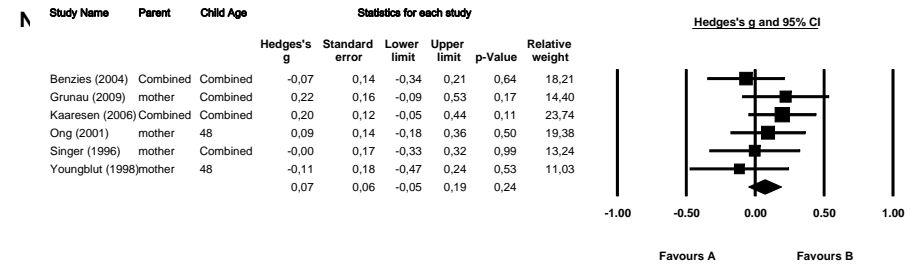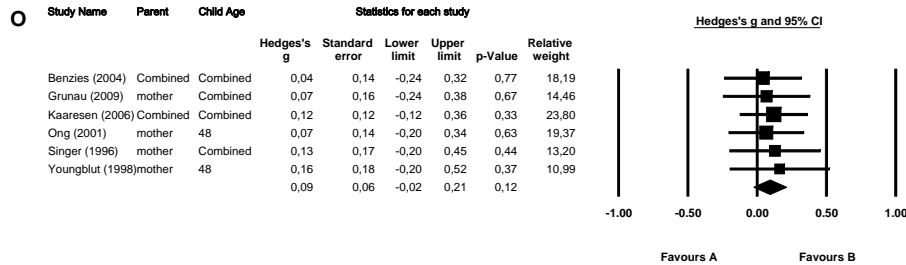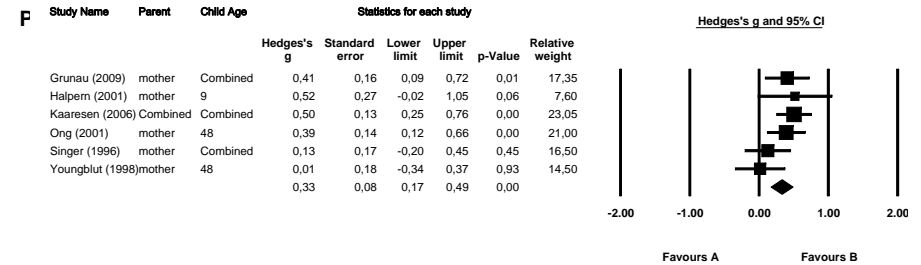

Q

| Study Name              | Parent   | Child Age | Statistics for each study |                |             |             |         |                 |
|-------------------------|----------|-----------|---------------------------|----------------|-------------|-------------|---------|-----------------|
|                         |          |           | Hedges's g                | Standard error | Lower limit | Upper limit | p-Value | Relative weight |
| Grunau (2009)           | mother   | Combined  | 0,32                      | 0,16           | 0,00        | 0,63        | 0,05    | 26,87           |
| Kaaresen (2006)Combined | Combined |           | 0,04                      | 0,12           | -0,20       | 0,28        | 0,75    | 39,24           |
| Ong (2001)              | mother   | 48        | -0,01                     | 0,14           | -0,28       | 0,26        | 0,93    | 33,90           |
|                         |          |           | 0,10                      | 0,09           | -0,09       | 0,28        | 0,30    |                 |

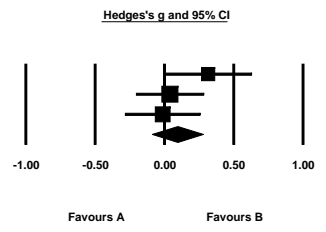

Supplement: pone.0054992.s004.pdf [file pone.0054992.s004.pdf]
