# Supplementary material for: Rethinking Stress in Parents of Preterm Infants: A Meta-Analysis
Source: PubMed Central journal article supplement (PMC3566126; doi:10.1371/journal.pone.0054992), 2013-02-06

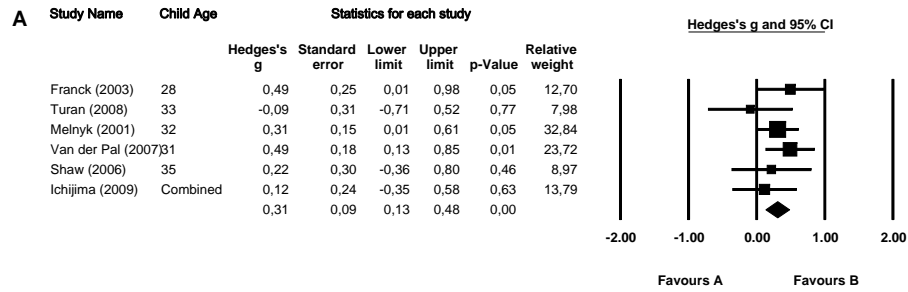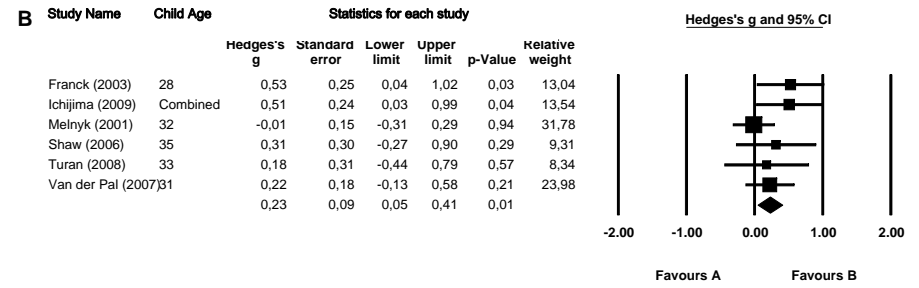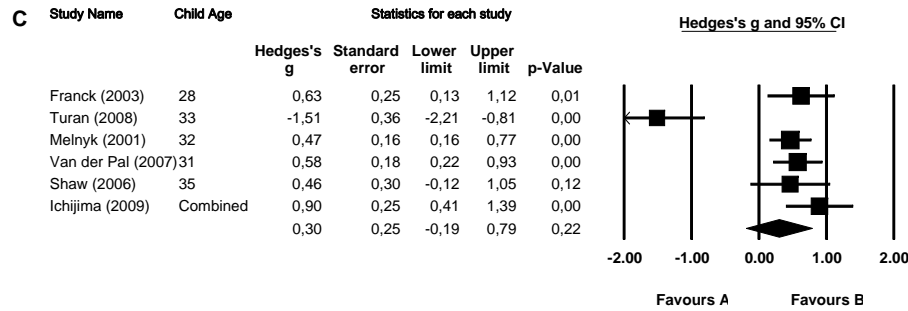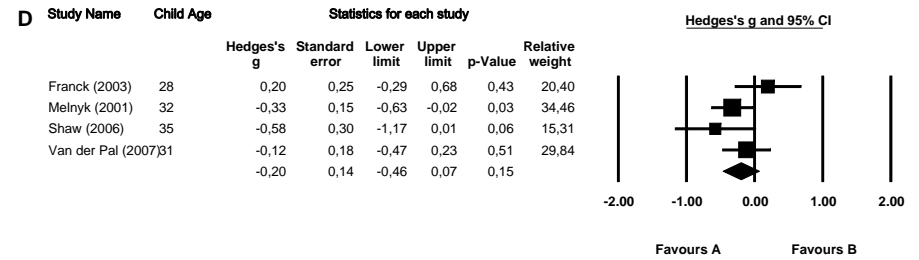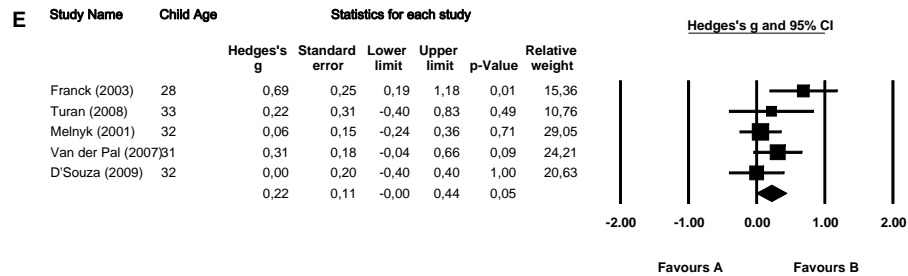

Supplement: pone.0054992.s005.pdf [file pone.0054992.s005.pdf]
